# Supplementary material for: Nonlinear optical and self-activated luminescent properties of A2W3O10 (A = Rb and Cs)
Source: Royal Society of Chemistry journal article supplement (doi:10.1039/c6ra03407a), 2016-01-01
Supplement: c6ra03407a1.pdf [file c6ra03407a1.pdf]

## Supporting Information

### Nonlinear Optical and Self-activated Luminescent Properties of

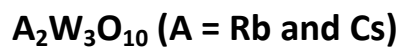

Min Zhang, Zhipeng Lian, Ying wang, Shilie Pan

**Table S1** Crystal Data and Structure Refinements for Rb<sub>2</sub>W<sub>3</sub>O<sub>10</sub> and Cs<sub>2</sub>W<sub>3</sub>O<sub>10</sub>.

| Empirical Formula                                                       | Rb <sub>2</sub> W <sub>3</sub> O <sub>10</sub>       | Cs <sub>2</sub> W <sub>3</sub> O <sub>10</sub>      |
|-------------------------------------------------------------------------|------------------------------------------------------|-----------------------------------------------------|
| Crystal system                                                          | Tetragonal                                           | Tetragonal                                          |
| space group                                                             | I $\bar{4}$                                          | I $\bar{4}$                                         |
| a (Å)                                                                   | 15.9516(9)                                           | 16.0980(9)                                          |
| c (Å)                                                                   | 10.0565(11)                                          | 10.1703(11)                                         |
| volume (Å <sup>3</sup> )                                                | 2558.9(3)                                            | 2635.6(4)                                           |
| Z                                                                       | 120/11                                               | 120/11                                              |
| density (calcd) (mg/cm <sup>3</sup> )                                   | 4.581                                                | 4.926                                               |
| abs coeff (mm <sup>-1</sup> )                                           | 34.493                                               | 31.594                                              |
| cryst size (mm <sup>3</sup> )                                           | 0.107×0.139 × 0.167                                  | 0.130×0.133×0.134                                   |
| the range for data collection<br>(deg)                                  | 2.39 to 27.45                                        | 2.37 to 24.98                                       |
| index ranges                                                            | -14 ≤ h ≤ 20, -20 ≤ k ≤ 18, -<br>13 ≤ l ≤ 12         | -17 ≤ h ≤ 19, -19 ≤ k ≤ 19, -<br>12 ≤ l ≤ 9         |
| reflns collected /unique                                                | 7864 / 2886<br>[R(int)=0.0691]                       | 6688 / 2305<br>[R(int) = 0.0515]                    |
| completeness                                                            | 99.9 %                                               | 99.8 %                                              |
| data/restraints/param                                                   | 2886 / 31 / 211                                      | 2306 / 31 / 211                                     |
| GOF on F <sup>2</sup>                                                   | 1.042                                                | 1.089                                               |
| final R indices<br>[Fo <sup>2</sup> >2σ(Fo <sup>2</sup> )] <sup>a</sup> | R <sub>1</sub> = 0.0488,<br>wR <sub>2</sub> = 0.1132 | R <sub>1</sub> = 0.0466,<br>wR <sub>2</sub> =0.1150 |
| R indices (all data) <sup>a</sup>                                       | R <sub>1</sub> = 0.0534,<br>wR <sub>2</sub> =0.1169  | R <sub>1</sub> = 0.484,<br>wR <sub>2</sub> = 0.1167 |
| Absolute structure<br>parameter                                         | 0.00                                                 | 0.00                                                |
| extinction coeff                                                        | 0.00057(4)                                           | 0.0000(13)                                          |
| largest diff peak and hole<br>(e/Å <sup>3</sup> )                       | 6.972 and -3.970                                     | 11.759 and -2.948                                   |

**Table S2** Atomic coordinates and equivalent isotropic displacement parameters for  $\text{Rb}_2\text{W}_3\text{O}_{10}$  and  $\text{Cs}_2\text{W}_3\text{O}_{10}$ .

| Atoms | x          | y          | z           | $U_{\text{eq}}(\text{\AA}^2)$ | OCC   |
|-------|------------|------------|-------------|-------------------------------|-------|
| W(1)  | 0.9620(1)  | 0.3914(1)  | 0.1164(1)   | 0.008(1)                      | 1     |
| W(2)  | 0.7381(1)  | 0.5156(1)  | 0.6650(1)   | 0.013(1)                      | 1     |
| W(3)  | 0.8689(1)  | 0.1828(1)  | 0.1465(1)   | 0.012(1)                      | 1     |
| W(4)  | 0.8520(1)  | 0.7208(1)  | 0.5873(1)   | 0.012(1)                      | 1     |
| W(5)  | 0.9010(6)  | 0.0500(5)  | 0.3764(10)  | 0.008(2)                      | 0.092 |
| Rb(1) | 1.0000     | 0          | 0.5000      | 0.097(4)                      | 0.908 |
| Rb(2) | 1.0000     | 0.5000     | 0.7500      | 0.087(4)                      | 1     |
| Rb(3) | 0.9102(2)  | 0.2936(3)  | 0.4941(4)   | 0.050(1)                      | 1     |
| Rb(4) | 0.5000     | 0.5000     | 0.5000      | 0.080(4)                      | 1     |
| Rb(5) | 0.1149(2)  | 0.2159(2)  | 0.2176(3)   | 0.026(1)                      | 1     |
| O(1)  | 0.9079(10) | 0.2966(9)  | 0.1876(14)  | 0.009(3)                      | 1     |
| O(2)  | 0.0144(9)  | 0.3347(9)  | 0.9893(16)  | 0.006(3)                      | 1     |
| O(3)  | 0.7997(9)  | 0.6101(11) | 0.6894(14)  | 0.009(3)                      | 1     |
| O(4)  | 0.8630(9)  | 0.4107(8)  | 0.0116(15)  | 0.002(3)                      | 1     |
| O(5)  | 0.6853(10) | 0.5618(11) | 0.5064(19)  | 0.017(4)                      | 1     |
| O(6)  | 0.7581(11) | 0.7139(9)  | 0.4821(18)  | 0.014(4)                      | 1     |
| O(7)  | 0.0429(9)  | 0.3924(9)  | 0.2429(16)  | 0.007(3)                      | 1     |
| O(8)  | 0.8107(11) | 0.0903(10) | 0.0841(16)  | 0.016(4)                      | 1     |
| O(9)  | 0.7985(10) | 0.4448(10) | 0.7748(15)  | 0.013(4)                      | 1     |
| O(10) | 1.0000     | 0.5000     | 0.0560(20)  | 0.007(4)                      | 1     |
| O(11) | 0.9002(12) | 0.8097(11) | 0.5130(20)  | 0.024(4)                      | 1     |
| O(12) | 0.7813(10) | 0.2058(11) | 0.2735(16)  | 0.013(3)                      | 1     |
| O(13) | 0.9385(13) | 0.1328(11) | 0.2550(20)  | 0.025(4)                      | 1     |
| O(14) | 0.6503(11) | 0.5350(13) | 0.7700(20)  | 0.023(4)                      | 1     |
| O(15) | 0.9030(30) | 0.972(110) | 0.5060(160) | 0.030(50)                     | 0.092 |
| O(16) | 1.0000     | 0          | 0.6690(20)  | 0.020(60)                     | 0.092 |

| <b>Atoms</b> | <b>x</b>   | <b>y</b>   | <b>z</b>    | <b>U<sub>eq</sub>(Å<sup>2</sup>)</b> | <b>OCC</b> |
|--------------|------------|------------|-------------|--------------------------------------|------------|
| W(1)         | 0.9588(1)  | 0.3938(1)  | 0.1191(1)   | 0.008(1)                             | 1          |
| W(2)         | 0.7408(1)  | 0.5111(1)  | 0.6559(1)   | 0.014(1)                             | 1          |
| W(3)         | 0.8634(1)  | 0.1868(1)  | 0.1414(1)   | 0.012(1)                             | 1          |
| W(4)         | 0.8523(1)  | 0.7163(1)  | 0.5977(1)   | 0.013(1)                             | 1          |
| W(5)         | 0.9002(6)  | 0.0499(6)  | 0.3748(11)  | 0.000(2)                             | 0.092      |
| Cs(1)        | 1.0000     | 0          | 0.5000      | 0.063(2)                             | 0.908      |
| Cs(2)        | 1.0000     | 0.5000     | 0.7500      | 0.035(1)                             | 1          |
| Cs(3)        | 0.9043(1)  | 0.2965(1)  | 0.4987(2)   | 0.019(1)                             | 1          |
| Cs(4)        | 0.5000     | 0.5000     | 0.5000      | 0.028(1)                             | 1          |
| Cs(5)        | 0.1114(1)  | 0.2137(1)  | 0.2254(2)   | 0.023(1)                             | 1          |
| O(1)         | 0.9029(12) | 0.3001(11) | 0.1820(17)  | 0.013(4)                             | 1          |
| O(2)         | 0.0121(11) | 0.3355(12) | 0.9950(20)  | 0.019(5)                             | 1          |
| O(3)         | 0.8003(11) | 0.6063(12) | 0.6859(18)  | 0.016(4)                             | 1          |
| O(4)         | 0.8636(13) | 0.4100(11) | 0.0010(20)  | 0.019(5)                             | 1          |
| O(5)         | 0.6889(10) | 0.5639(11) | 0.5030(20)  | 0.013(4)                             | 1          |
| O(6)         | 0.7625(13) | 0.7123(10) | 0.4890(20)  | 0.019(5)                             | 1          |
| O(7)         | 0.0382(11) | 0.3903(10) | 0.2485(18)  | 0.006(4)                             | 1          |
| O(8)         | 0.8079(10) | 0.0945(9)  | 0.0765(16)  | 0.006(4)                             | 1          |
| O(9)         | 0.8027(10) | 0.4410(9)  | 0.7636(18)  | 0.006(4)                             | 1          |
| O(10)        | 1.0000     | 0.5000     | 0.0590(20)  | 0.000(4)                             | 1          |
| O(11)        | 0.9007(10) | 0.8038(11) | 0.5370(20)  | 0.016(5)                             | 1          |
| O(12)        | 0.7724(11) | 0.2068(10) | 0.2645(17)  | 0.007(4)                             | 1          |
| O(13)        | 0.9262(13) | 0.1376(11) | 0.2530(20)  | 0.019(5)                             | 1          |
| O(14)        | 0.6563(12) | 0.5249(11) | 0.7600(20)  | 0.015(4)                             | 1          |
| O(15)        | 0.9040(20) | 0.974(70)  | 0.5050(110) | 0.000(30)                            | 0.092      |
| O(16)        | 1.0000     | 0          | 0.6670(20)  | 0.000(50)                            | 0.092      |
